# Supplementary material for: Differences in Genotype and Virulence among Four Multidrug-Resistant Streptococcus pneumoniae Isolates Belonging to the PMEN1 Clone
Source: PLoS One. 2011 Dec 19;6(12):e28850. doi: 10.1371/journal.pone.0028850 (PMC3242761; doi:10.1371/journal.pone.0028850)
Supplement: Table S2 — Primers used to design SV35-T3-SV36blp and 4595-T23KOPavB. (XLS) [file pone.0028850.s003.xls]

## Sheet: S4
Table S2: Primers used to design SV35-T3-SV36blp and 4595-T23KOPavB
Description	SEQUENCE
SV36-T3 spiA flank F	TTGCTTTTGTCCTCCTGATAGACC
SV36-T3 spiA flank R BamHI	ATATGGATCCAGCCACCTCTAAATGTTTAA
SV36-T3 blpI flank F XmaI	ATATCCCGGGAAAACCTAATTCAAGACGTT
SV36-T3 blpI flank R	CTGTAAATTAAGCTAGCAAATACAGGGGAG
SV36-T3 spiA-cass-blpI F	CCAAGATAGAGCCATTAAAG
SV36-T3 spiA-cass-blpI R	CTACACCTCCAAGTATAGCTC
SV36-T3 blp locus F	TGATTCAAGACCTGCAATAC
SV36-T3 blp locus R	CAAAGCGTAGCTCAAAACAG
4595-T23 PavB Flank 1 XmaI F	GACCACGCAGAGCGCATCAATCAG
4595-T23 PavB Flank 1 XmaI R	ATATCCCGGGCGACACTGAGACGGCGAATAGACC
4595-T23 PavB Flank 2 BamHI F	ATATGGATCCGCTTCTGCTAACAAGATGTCTGATACG
4595-T23 PavB Flank 2 BamHI R	CCGTACTGGCTGCTGACTGTG
